# Supplementary material for: Heterogeneity of T Cell Responses to Pandemic pH1N1 Monovalent Vaccine in HIV-Infected Pregnant Women
Source: PubMed Central journal article supplement — AIDS Res Hum Retroviruses. 2015 Nov 1;31(11):1170–7. doi: 10.1089/aid.2015.0151 (PMC4651022; doi:10.1089/aid.2015.0151), 2015-11-01
Supplement: Supp_Table1.pdf [file Supp_Table1.pdf]

## Supplementary Data

SUPPLEMENTARY TABLE S1. pH1N1-SPECIFIC Th1  
AND CYTOTOXIC T CELL SUBSETS BEFORE  
AND AFTER ADMINISTRATION OF pH1N1 VACCINE

| Variable (%) <sup>a</sup>                             | Median (IQR)<br>at baseline <sup>b</sup> | Median (IQR)<br>postdose 1 <sup>c</sup> |
|-------------------------------------------------------|------------------------------------------|-----------------------------------------|
| CD4 <sup>+</sup> IL-2 <sup>+</sup>                    | 0.35 (-1.64, 2.07)                       | 0.08 (-1.22, 1.60)                      |
| CD4 <sup>+</sup> MIP1β <sup>+</sup>                   | 0.10 (-1.46, 1.73)                       | -0.05 (-1.73, 1.01)                     |
| CD4 <sup>+</sup> MIP1β <sup>+</sup> IL2 <sup>+</sup>  | -0.12 (-0.44, 0.38)                      | -0.01 (-0.53, 0.23)                     |
| CD4 <sup>+</sup> PERF <sup>+</sup>                    | -0.35 (-1.83, 1.73)                      | -0.49 (-2.22, 1.31)                     |
| CD4 <sup>+</sup> TNF-α <sup>+</sup>                   | -0.19 (-1.35, 2.37)                      | -0.21 (-0.97, 1.04)                     |
| CD4 <sup>+</sup> PERF <sup>+</sup> TNF-α <sup>+</sup> | -0.08 (-0.41, 0.94)                      | 0.04 (-0.56, 0.46)                      |
| CD8 <sup>+</sup> IL-2 <sup>+</sup>                    | 0.34 (-1.22, 1.77)                       | 0.45 (-1.01, 2.08)                      |
| CD8 <sup>+</sup> MIP1β <sup>+</sup>                   | 0.67 (-1.43, 2.46)                       | 0.83 (-0.97, 2.49)                      |
| CD8 <sup>+</sup> MIP1β <sup>+</sup> IL-2 <sup>+</sup> | 0.06 (-0.91, 0.83)                       | 0.22 (-0.25, 1.06)                      |
| CD8 <sup>+</sup> PERF <sup>+</sup>                    | 0.95 (-2.14, 4.33)                       | 0.11 (-1.17, 1.76)                      |
| CD8 <sup>+</sup> TNF-α <sup>+</sup>                   | 0.72 (-0.52, 3.63)                       | 0.35 (-1.57, 2.48)                      |
| CD8 <sup>+</sup> PERF <sup>+</sup> TNF-α <sup>+</sup> | 0.38 (-0.58, 1.68)                       | 0.10 (-0.64, 0.84)                      |

<sup>a</sup>Subsets, measured by flow cytometry, are expressed as a percentage of the parent CD4<sup>+</sup> or CD8<sup>+</sup> B cell population.

<sup>b</sup>N=49.

<sup>c</sup>N=51.
