# Supplementary material for: Heterogeneity of T Cell Responses to Pandemic pH1N1 Monovalent Vaccine in HIV-Infected Pregnant Women
Source: PubMed Central journal article supplement — AIDS Res Hum Retroviruses. 2015 Nov 1;31(11):1170–7. doi: 10.1089/aid.2015.0151 (PMC4651022; doi:10.1089/aid.2015.0151), 2015-11-01
Supplement: Supp_Table2.pdf [file Supp_Table2.pdf]

SUPPLEMENTARY TABLE S2. pH1N1-SPECIFIC TREG  
AND BREG BEFORE AND AFTER ADMINISTRATION  
OF pH1N1 VACCINE

| <i>Variable (%)<sup>a</sup></i>                                | <i>Median (IQR)<br/>at baseline<sup>b</sup></i> | <i>Median (IQR)<br/>postdose 1<sup>c</sup></i> |
|----------------------------------------------------------------|-------------------------------------------------|------------------------------------------------|
| CD4 <sup>+</sup> FoxP3 <sup>+</sup>                            | -0.38 (-1.20, 1.85)                             | 0.17 (-0.78, 1.52)                             |
| CD4 <sup>+</sup> IL-10 <sup>+</sup>                            | -0.25 (-1.05, 2.24)                             | 0.51 (-0.80, 1.98)                             |
| CD4 <sup>+</sup> IL-10 <sup>+</sup> FoxP3 <sup>+</sup>         | 0.00 (-0.15, 0.22)                              | 0.01 (-0.14, 0.20)                             |
| CD4 <sup>+</sup> TGF- $\beta$ <sup>+</sup>                     | 0.05 (-1.03, 1.49)                              | -0.06 (-2.00, 1.19)                            |
| CD4 <sup>+</sup> TGF- $\beta$ <sup>+</sup> FoxP3 <sup>+</sup>  | 0.01 (-0.22, 0.35)                              | -0.01 (-0.22, 0.14)                            |
| CD8 <sup>+</sup> FoxP3 <sup>+</sup>                            | -0.36 (-2.12, 1.56)                             | 0.25 (-1.12, 2.38)                             |
| CD8 <sup>+</sup> IL-10 <sup>+</sup>                            | -0.16 (-2.73, 1.66)                             | 0.73 (-0.79, 2.01)                             |
| CD8 <sup>+</sup> IL-10 <sup>+</sup> FoxP3 <sup>+</sup>         | -0.10 (-0.71, 0.29)                             | 0.13 (-0.15, 0.68)                             |
| CD8 <sup>+</sup> TGF- $\beta$ <sup>+</sup>                     | -0.28 (-1.57, 1.62)                             | -0.10 (-2.46, 0.72)                            |
| CD8 <sup>+</sup> TGF- $\beta$ <sup>+</sup> FoxP3 <sup>+</sup>  | -0.04 (-0.77, 0.46)                             | 0.01 (-0.27, 0.64)                             |
| CD19 <sup>+</sup> FoxP3 <sup>+</sup>                           | -0.26 (-1.68, 1.17)                             | 0.19 (-0.38, 1.49)                             |
| CD19 <sup>+</sup> IL-10 <sup>+</sup>                           | 1.12 (-1.13, 3.94)                              | 0.33 (-1.42, 2.85)                             |
| CD19 <sup>+</sup> IL-10 <sup>+</sup> FoxP3 <sup>+</sup>        | 0.00 (-0.16, 0.11)                              | -0.01 (-0.09, 0.26)                            |
| CD19 <sup>+</sup> TGF- $\beta$ <sup>+</sup>                    | -0.29 (-2.14, 0.77)                             | -0.17 (-1.70, 1.34)                            |
| CD19 <sup>+</sup> TGF- $\beta$ <sup>+</sup> FoxP3 <sup>+</sup> | 0.04 (-0.15, 0.22)                              | -0.04 (-0.28, 0.08)                            |

<sup>a</sup>Subsets, measured by flow cytometry, are expressed as a percentage of the parent CD4<sup>+</sup> or CD8<sup>+</sup> B cell population.

<sup>b</sup>N=45.

<sup>c</sup>N=48.
